## CORRECTION

# Correction: Machine learning approach yields epigenetic biomarkers of food allergy: A novel 13-gene signature to diagnose clinical reactivity

The *PLOS ONE* Staff

In the Introduction, there is an error in the third sentence of the third paragraph. The correct sentence is: As a result, food challenges are often under performed, leading to an overdiagnosis of FA [9].

There is an error in [Table 6](#). The vales in column 4 "Average Accuracy" are incorrect. The publisher apologizes for the error. Please see the correct [Table 6](#) here.

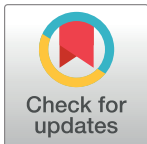

## OPEN ACCESS

**Citation:** The *PLOS ONE* Staff (2019) Correction: Machine learning approach yields epigenetic biomarkers of food allergy: A novel 13-gene signature to diagnose clinical reactivity. *PLoS ONE* 14(7): e0220470. <https://doi.org/10.1371/journal.pone.0220470>

**Published:** July 24, 2019

**Copyright:** © 2019 The PLOS ONE Staff. This is an open access article distributed under the terms of the [Creative Commons Attribution License](#), which permits unrestricted use, distribution, and reproduction in any medium, provided the original author and source are credited.

**Table 6. Average hidden data accuracy across a large number of dataset permutations.**

| Number | Signature | <i>n</i> | Average Accuracy | AUROC   | 95% CI for Accuracy |
|--------|-----------|----------|------------------|---------|---------------------|
| 1      | 12-CpG #1 | 200      | 95.313           | 0.98328 | (94.175, 96.451)    |
| 2      | 12-CpG #2 | 200      | 95.625           | 0.98531 | (94.483, 96.767)    |
| 3      | 18-CpG    | 200      | 93.438           | 0.98047 | (92.216, 94.734)    |

This table shows the average accuracy and AUROC across *n* randomized hidden test cohorts. The 95% Confidence Interval for accuracy is also shown and provides an estimate for the true population accuracy of each classifier on similar cohorts of patients.

<https://doi.org/10.1371/journal.pone.0220470.t001>

## Reference

1. Alag A (2019) Machine learning approach yields epigenetic biomarkers of food allergy: A novel 13-gene signature to diagnose clinical reactivity. PLoS ONE 14(6): e0218253. <https://doi.org/10.1371/journal.pone.0218253> PMID: 31216310
